# Supplementary material for: Shear adhesive strength between epoxy resin and copper surfaces: a density functional theory study
Source: Royal Society of Chemistry journal article supplement (doi:10.1039/d2cp03354b), 2022-01-01
Supplement: d2cp03354b1.pdf [file d2cp03354b1.pdf]

## **Electronic Supplementary Information (ESI)**

# Shear adhesive strength between epoxy resin and copper surfaces: a density functional theory study

Yosuke Sumiya,<sup>a</sup> Yuta Tsuji<sup>b</sup> and Kazunari Yoshizawa<sup>\*a</sup>

<sup>a</sup>. Institute for Materials Chemistry and Engineering and IRCCS, Kyushu University, Nishi-ku,  
Fukuoka 819-0395, Japan.

<sup>b</sup>. Faculty of Engineering Sciences, Kyushu University, 6-1, Kasuga-koen, Kasuga, Fukuoka,  
816-8580, Japan.

\*Corresponding author Email: [kazunari@ms.ifoc.kyushu-u.ac.jp](mailto:kazunari@ms.ifoc.kyushu-u.ac.jp)

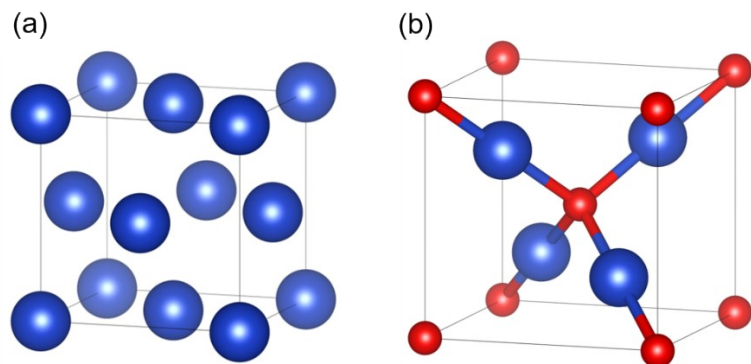

**Fig. S1** (a) Optimized Cu unit cell. (b) Optimized Cu<sub>2</sub>O unit cell. The blue and red atoms correspond to copper and oxygen atoms, respectively.

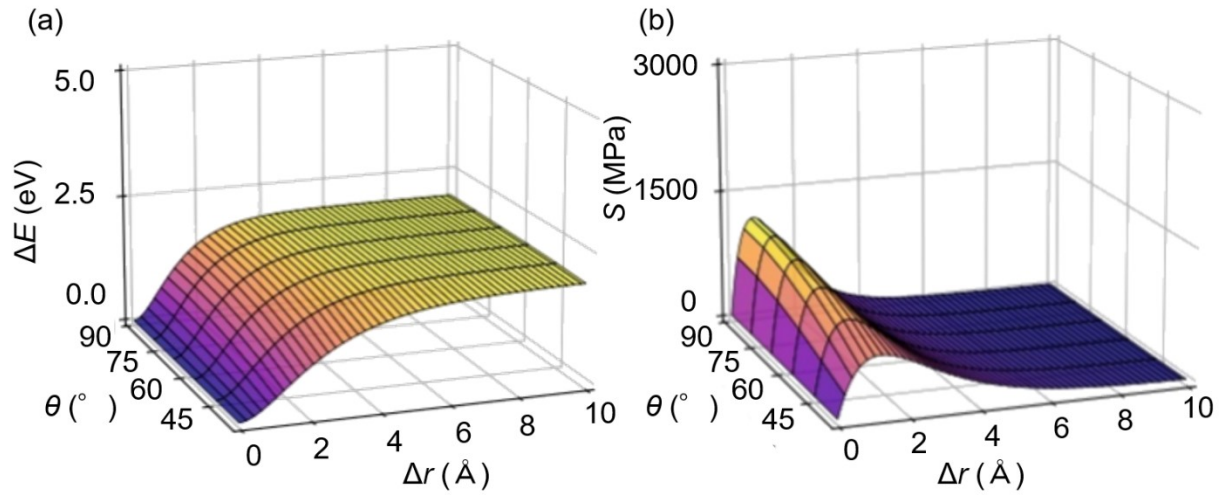

**Fig. S2** (a) and (b) show 3D plot of the energy and adhesive stress surfaces of the epoxy molecule on the Cu(111) surface.

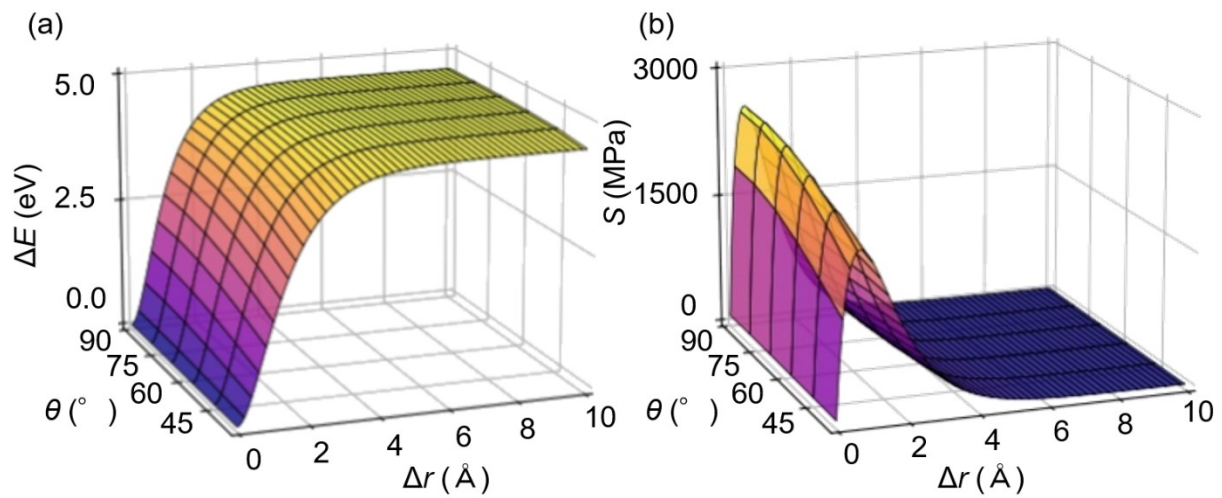

**Fig. S3** (a) and (b) show 3D plot of the energy and adhesive stress surfaces of the epoxy molecule on the Cu<sub>2</sub>O(111) surface.

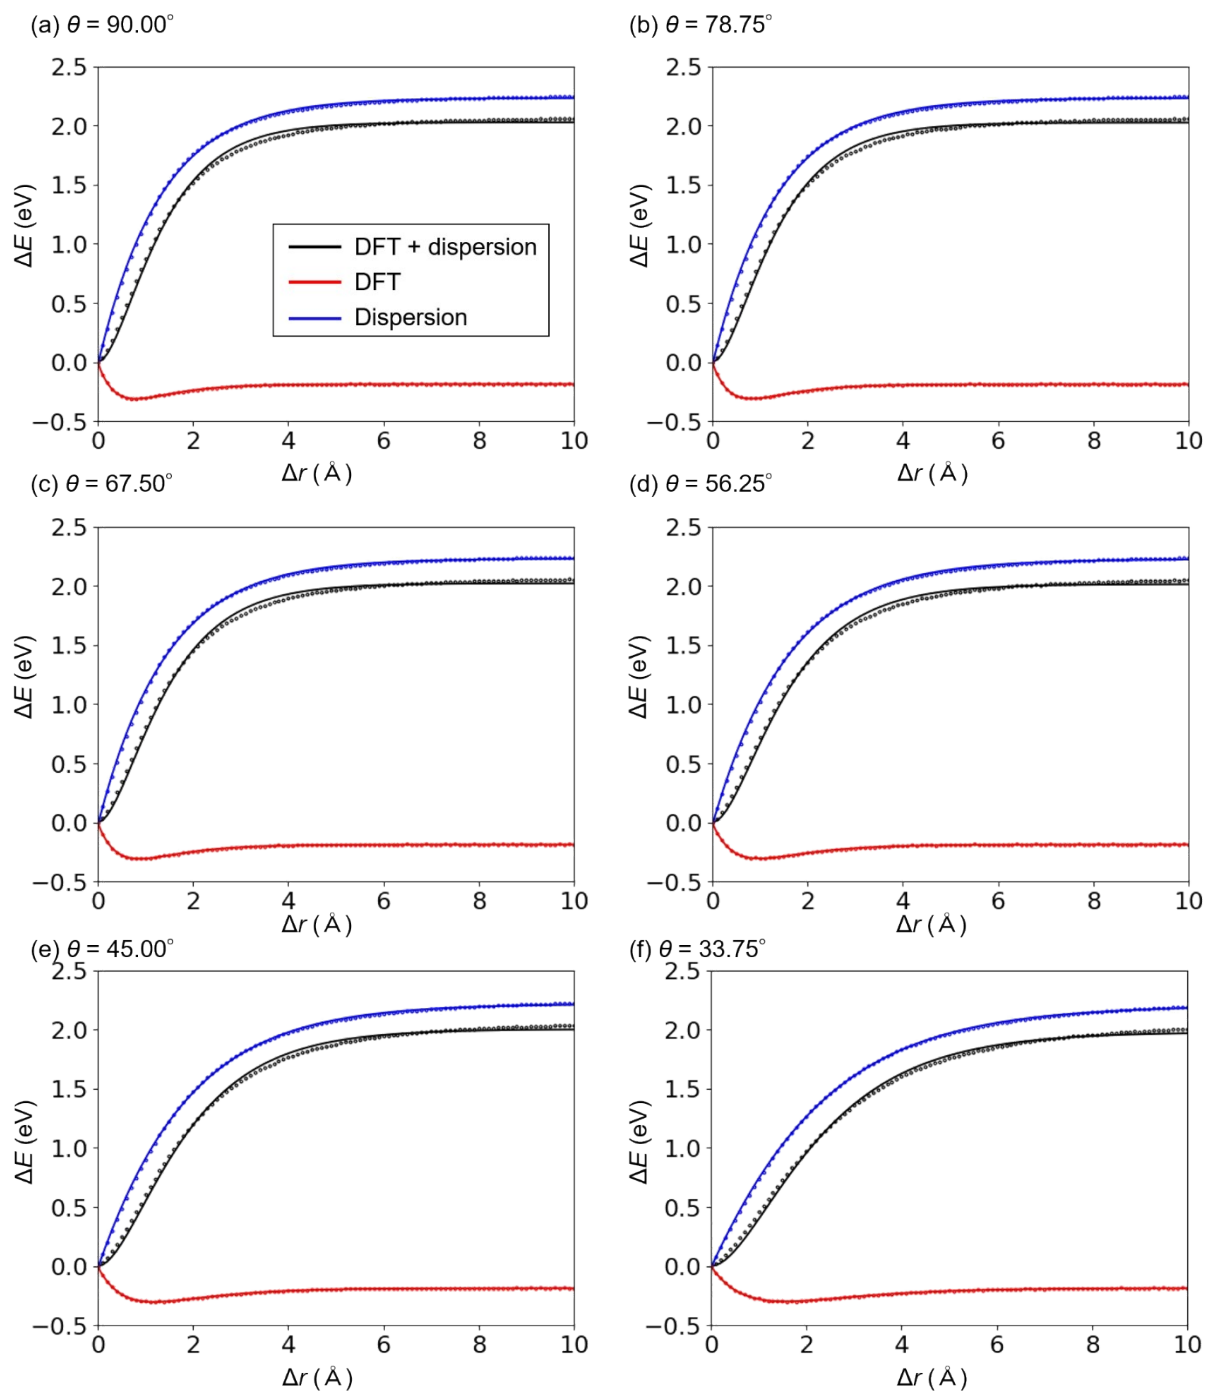

**Fig. S4** Plots of the computed values in the range of  $33.75^\circ \leq \theta \leq 90.00^\circ$  for the epoxy molecule/Cu(111) surface. Each point in the dotted line corresponds to the value obtained by the single-point calculation, and the curves obtained by fitting them are represented as the black, blue, and red solid lines: Black corresponds to total, blue to dispersion, and red to DFT.

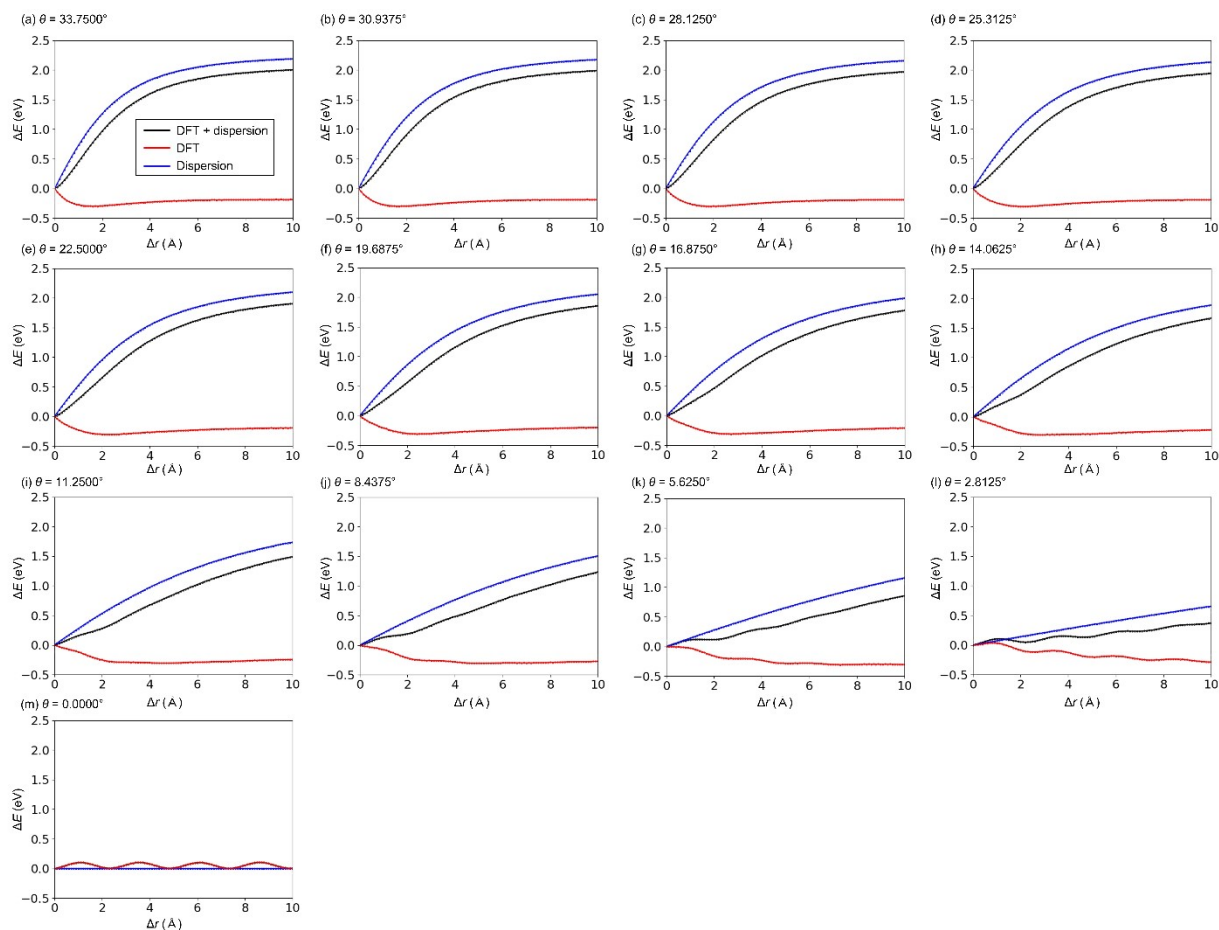

**Fig. S5** Plots of the computed values in the range of  $0.0000^\circ \leq \theta \leq 33.7500^\circ$  for the epoxy molecule/Cu(111) surface. Each point in the dotted line corresponds to the value obtained by the single-point calculation, and the curves obtained by fitting them are represented as the black, blue, and red solid lines: Black corresponds to total, blue to dispersion, and red to DFT.

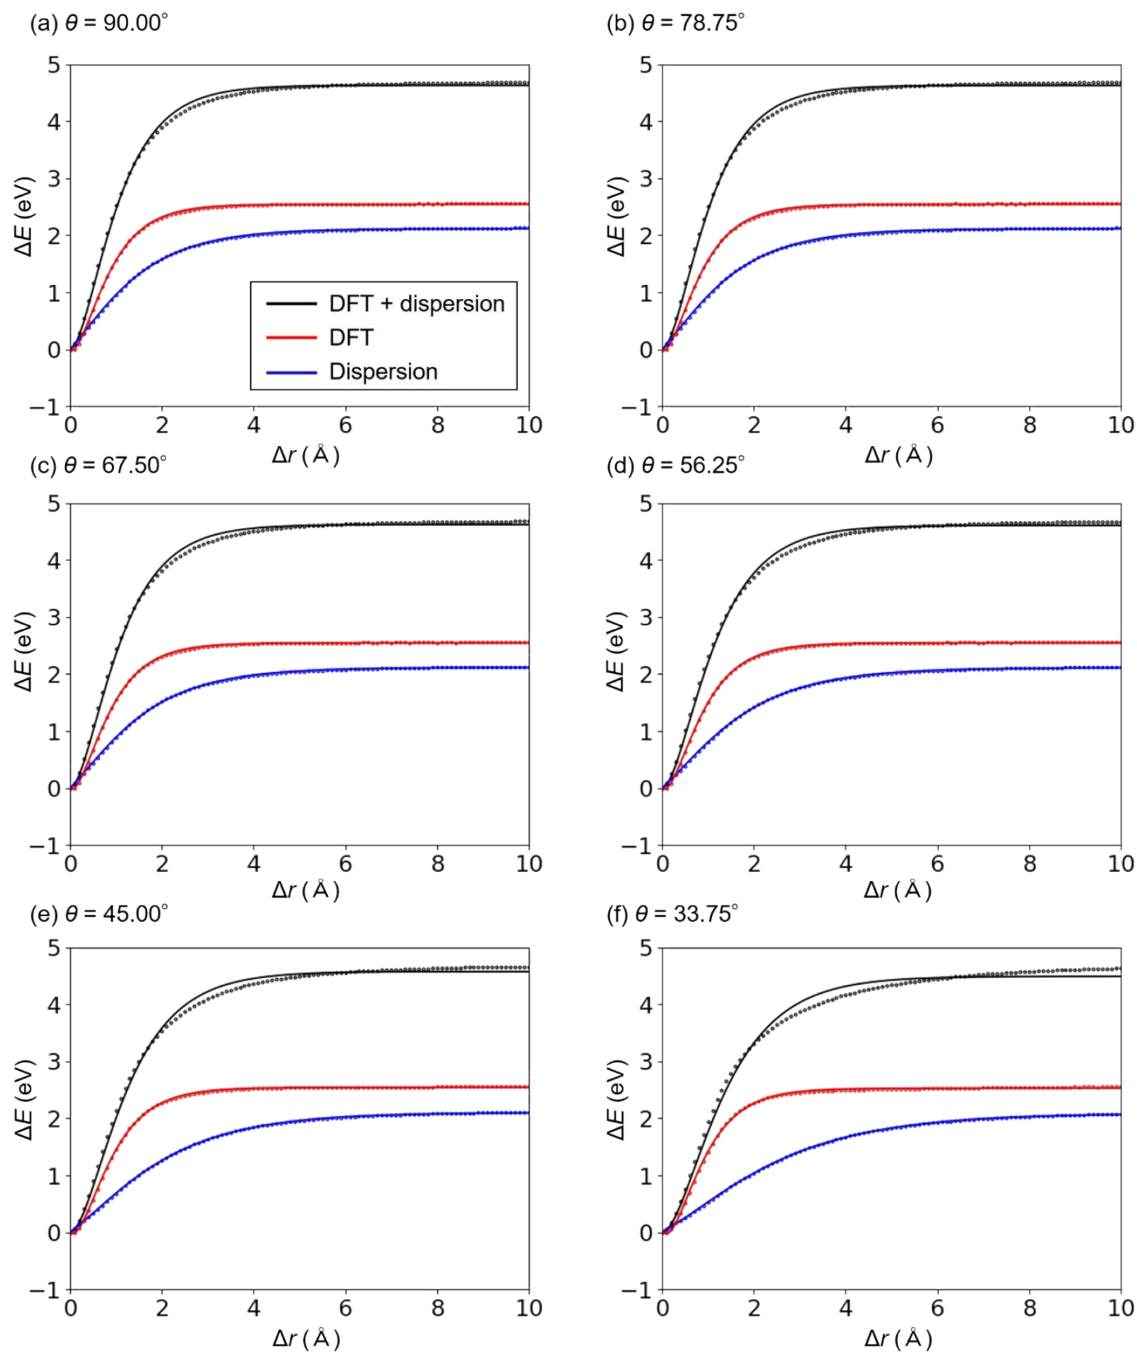

**Fig. S6** Plots of the computed values in the range of  $33.75^\circ \leq \theta \leq 90.00^\circ$  for the epoxy molecule/ $\text{Cu}_2\text{O}(111)$  surface. Each point in the dotted line corresponds to the value obtained by the single-point calculation, and the curves obtained by fitting them are represented as the black, blue, and red solid lines: Black corresponds to total, blue to dispersion, and red to DFT.

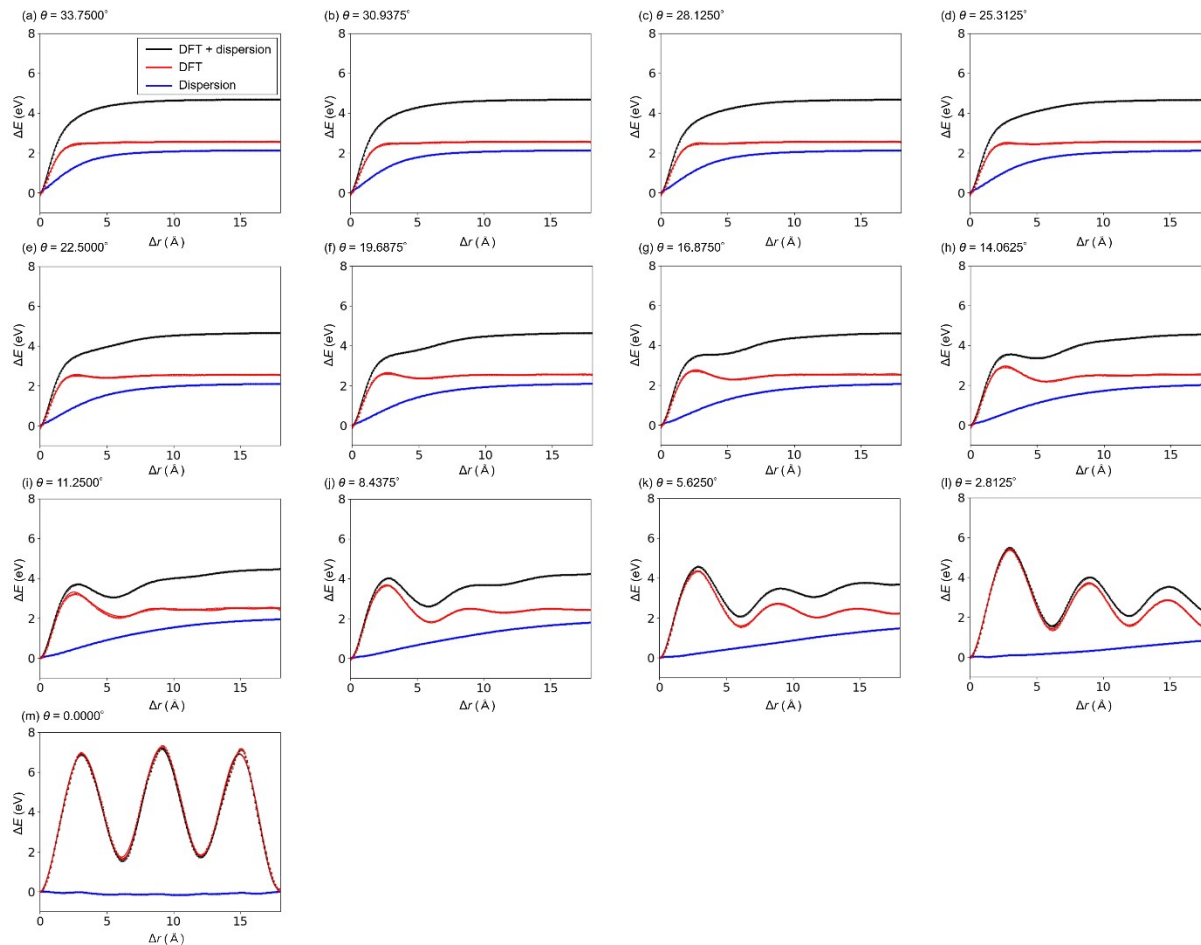

**Fig. S7** Plots of the computed values in the range of  $0.0000^\circ \leq \theta \leq 33.7500^\circ$  for the epoxy molecule/ $\text{Cu}_2\text{O}(111)$  surface. Each point in the dotted line corresponds to the value obtained by the single-point calculation, and the curves obtained by fitting them are represented as the black, blue, and red solid lines: Black corresponds to total, blue to dispersion, and red to DFT.

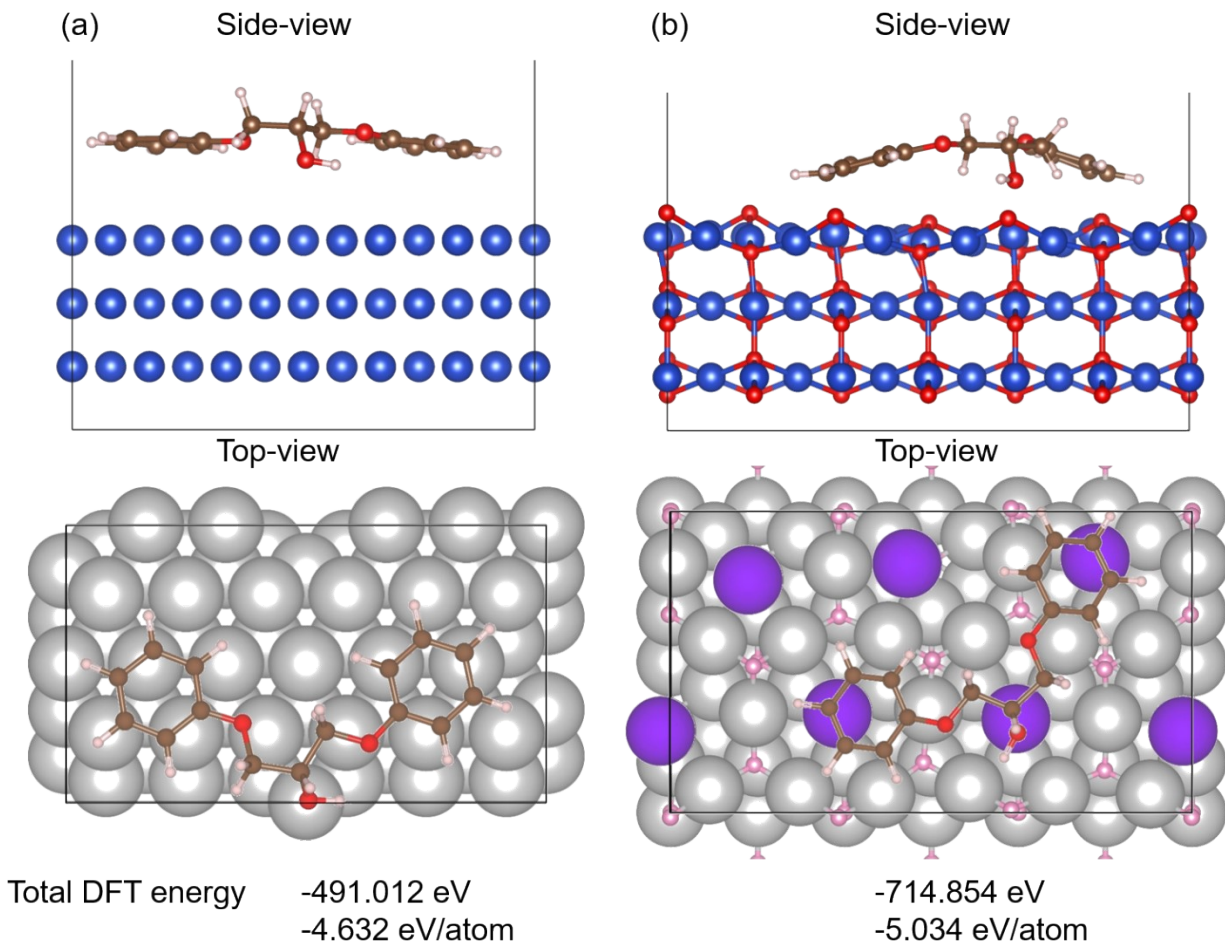

**Fig. S8** Total DFT energy of (a) the epoxy/Cu(111) surface and (b) the epoxy/Cu<sub>2</sub>O(111) surface, which was calculated in the way that the atomic reference energies were subtracted from the whole DFT energy of the unit cell, so that it can be regarded as an approximate cohesive energy or the atomization energy of the compound of a certain kind.



The OH groups of the epoxy resin interacted with (a) the Cu(111) surface, and the two benzene rings of the epoxy resin interacted with the OH groups for (b) the Cu<sub>2</sub>O(111) surface. Molecular interactions are visualized by isosurfaces of charge density difference in Fig. S9.

The crystal orbital Hamilton population (COHP) analysis<sup>1</sup> was performed to estimate the strength of the interactions using LOBSTER<sup>2</sup>. The values in the projected COHP (pCOHP) plots shown in Fig. S9 have been multiplied by -1 so that positive -pCOHP values means binding interactions. The dashed line indicates the Fermi level. The positive -pCOHP values below the Fermi level in (b) are larger than in (a). In both (a) and (b), the bonding type orbital interactions exist over a relatively wide energy range. To compare the orbital interaction energies, the pCOHP values were integrated up to the Fermi level for each atomic pair. These are called ICOHP. A negative ICOHP value can be read as bonding energy. Comparison of the ICOHPs shows that all of the interactions in (b) are larger than in (a).

#### References:

1. R. Dronskowski and P. E. Bloechl, *J. Phys. Chem.*, 1993, **97**, 8617-8624.
2. V. L. Deringer, A. L. Tchougreeff and R. Dronskowski, *J. Phys. Chem. A*, 2011, **115**, 5461-5466.

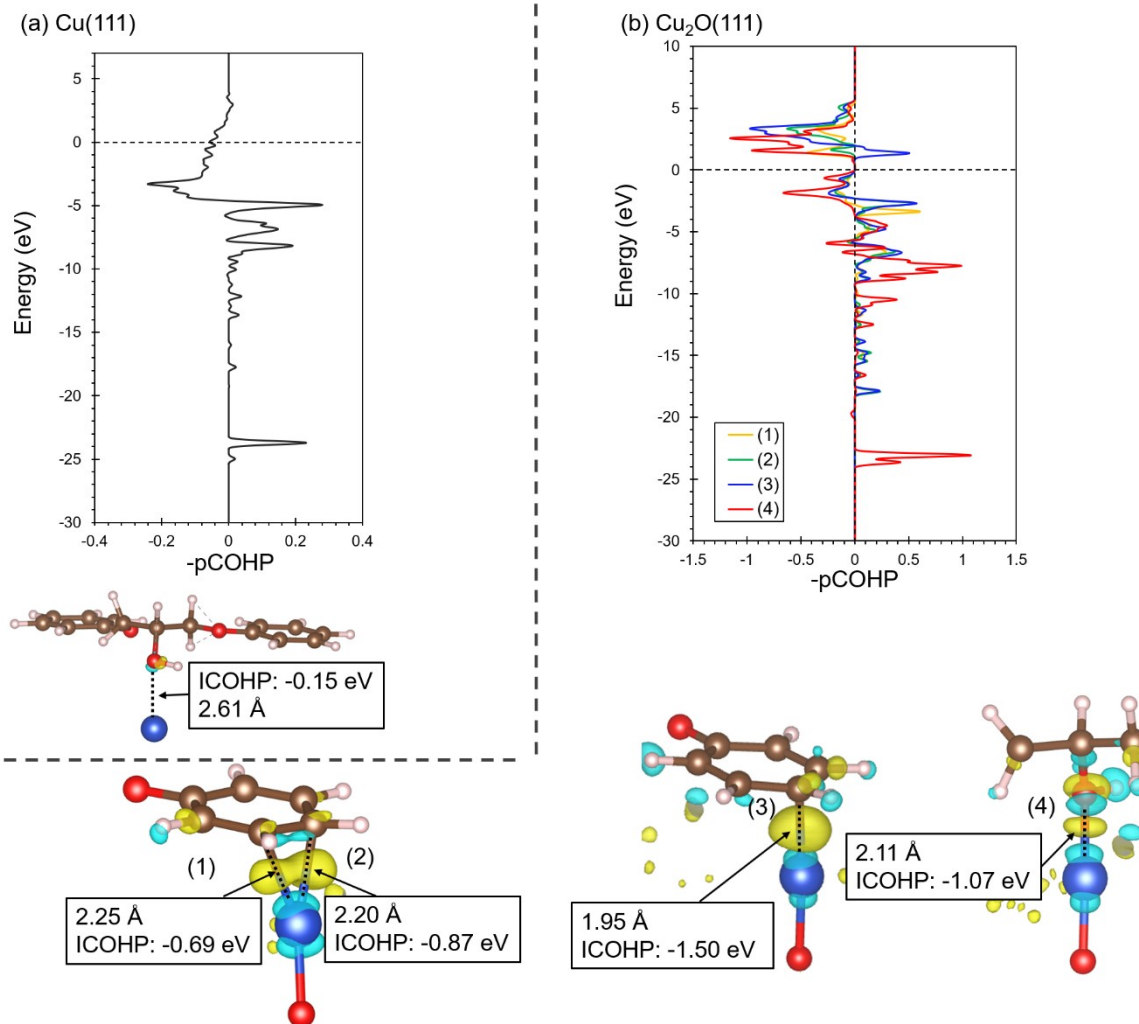

**Fig. S9** Negative of pCOHP (-pCOHP), atomic distances (Å) and integrated pCOHP (ICOHP) for interactions between the epoxy resin and the surfaces. (a) The interaction between the OH group and the Cu(111) surface. (b) The interaction of (1), (2), and (3) the benzene ring, (4) the OH group for the Cu<sub>2</sub>O(111). Molecular interactions are visualized by isosurfaces of charge density difference. Yellow and cyan indicate charge accumulation and depletion, respectively. The isovalue is set to 0.005.

$$E = D(1 - \exp(-a(\Delta r - \alpha)))^2 + \sum_{i=1}^5 b_i \cos(c_i \Delta r - d_i) + \beta \#(S1)$$

**Table S1.** Values of the fitting parameters using eqn (S1) for the energy curves of the epoxy molecule for Cu(111) surface. Eqn (S1) is the same as eqn (4) in the main text.

| $\theta$ (°)             | 0.0000 | 2.8125 | 5.6250 | 8.4375 | 11.2500 | 14.0625 | 16.8750 | 19.6875 | 22.5000 | 25.3125 | 28.1250 | 30.9375 | 33.7500 |
|--------------------------|--------|--------|--------|--------|---------|---------|---------|---------|---------|---------|---------|---------|---------|
| $D$ (eV)                 | 0.00   | 4.31   | 1.32   | 2.12   | 1.61    | 1.76    | 2.05    | 2.80    | 2.78    | 1.64    | 2.32    | 1.00    | 1.24    |
| $a$ (Å <sup>-1</sup> )   | 2.70   | 0.03   | 0.15   | 0.14   | 0.28    | 0.29    | 0.53    | 0.84    | 0.91    | 1.11    | 0.88    | 1.38    | 1.01    |
| $b_1$ (eV)               | -0.20  | -1.07  | 0.01   | 12.18  | -0.06   | -0.66   | 0.35    | -5.29   | -1.76   | -1.11   | -0.72   | -0.86   | -0.61   |
| $b_2$ (eV)               | -1.21  | 0.06   | 0.45   | -11.3  | 1.16    | 1.66    | 0.29    | -1.70   | -0.66   | -0.01   | -0.24   | -0.33   | 0.02    |
| $b_3$ (eV)               | 0.76   | 0.03   | 0.45   | 8.88   | 1.11    | -1.52   | 0.17    | -4.22   | 0.00    | 1.01    | 0.17    | 0.23    | 0.26    |
| $b_4$ (eV)               | 0.77   | -1.00  | 0.00   | -4.75  | -0.49   | 0.73    | -0.05   | -1.95   | -0.05   | -0.29   | -0.19   | 0.02    | -0.05   |
| $b_5$ (eV)               | 0.05   | 1.99   | 0.02   | 3.26   | 0.44    | 0.08    | 1.08    | -1.09   | 1.03    | 0.79    | 0.78    | 1.06    | 0.61    |
| $c_1$ (Å <sup>-1</sup> ) | 0.94   | 1.80   | 1.75   | 1.98   | 0.53    | 1.71    | 1.56    | 1.06    | 0.24    | 0.81    | 0.92    | 0.81    | 0.41    |
| $c_2$ (Å <sup>-1</sup> ) | 0.63   | 1.31   | 2.38   | 2.08   | 2.31    | 1.99    | 1.72    | 1.30    | 0.94    | 1.61    | 1.71    | 1.38    | 1.68    |
| $c_3$ (Å <sup>-1</sup> ) | 0.79   | 2.49   | 2.39   | 1.88   | 2.21    | 1.86    | 1.20    | 1.22    | 2.20    | 0.92    | 1.75    | 1.54    | 0.97    |
| $c_4$ (Å <sup>-1</sup> ) | 0.48   | 1.66   | 3.67   | 2.13   | 2.37    | 2.07    | 1.97    | 0.95    | 1.39    | 1.12    | 1.38    | 1.87    | 1.51    |
| $c_5$ (Å <sup>-1</sup> ) | 2.49   | 1.74   | 7.38   | 1.81   | 2.12    | 1.32    | 0.17    | 0.93    | 0.77    | 0.62    | 0.76    | 0.63    | 0.70    |
| $d_1$                    | 1.62   | 3.35   | 3.14   | 4.04   | 2.48    | 7.63    | 1.24    | 2.34    | 1.31    | 1.68    | 1.15    | 0.00    | 1.52    |
| $d_2$                    | 0.02   | 6.97   | 3.83   | -1.74  | 0.76    | 0.00    | -0.88   | -2.36   | 0.00    | -0.99   | 0.01    | 0.59    | -5.21   |
| $d_3$                    | 0.85   | 8.42   | 0.79   | 6.65   | 3.23    | 5.45    | 2.07    | 0.23    | 8.36    | 3.05    | 0.38    | 1.58    | -3.67   |
| $d_4$                    | -0.73  | 2.57   | 8.18   | -4.59  | 1.18    | -2.67   | -5.57   | -1.46   | -0.13   | -1.35   | 1.06    | 0.41    | 0.00    |
| $d_5$                    | 8.93   | 3.01   | 1.00   | 9.45   | 5.82    | 5.24    | 3.97    | -1.96   | -1.13   | -0.59   | 0.00    | -1.28   | -2.44   |
| $\alpha$ (Å)             | 2.86   | 0.01   | 0.03   | -0.55  | 0.00    | 0.33    | 0.00    | -0.44   | -0.62   | -0.50   | -0.46   | -0.41   | -0.38   |
| $\beta$ (eV)             | 0.17   | 0.07   | 0.03   | 0.03   | 0.00    | 0.10    | 0.55    | -1.23   | 0.20    | -0.01   | -0.58   | 0.62    | 0.64    |

**Table S2.** Values of the fitting parameters using eqn (S1) for the energy curves of the epoxy molecule for Cu<sub>2</sub>O(111) surface. Eqn (S1) is the same as eqn (4) in the main text.

| $\theta$ (°)             | 0.0000 | 2.8125 | 5.6250 | 8.4375 | 11.2500 | 14.0625 | 16.8750 | 19.6875 | 22.5000 | 25.3125 | 28.1250 | 30.9375 | 33.7500 |
|--------------------------|--------|--------|--------|--------|---------|---------|---------|---------|---------|---------|---------|---------|---------|
| $D$ (eV)                 | 1.63   | -0.34  | 2.97   | 4.08   | 2.46    | 5.79    | 5.90    | 6.17    | 6.34    | 6.45    | 6.46    | 6.41    | 6.25    |
| $a$ (Å <sup>-1</sup> )   | 1.91   | 7.21   | 0.83   | 0.59   | 0.13    | 0.15    | 0.72    | 0.78    | 0.83    | 0.89    | 0.95    | 1.00    | 1.06    |
| $b_1$ (eV)               | 23.90  | 0.04   | -8.01  | -18.4  | -533.7  | -746.9  | 136.6   | -5.29   | -1.76   | -1.11   | -90.79  | 92.46   | 33.05   |
| $b_2$ (eV)               | 44.14  | 1.82   | -0.40  | 37.17  | -558.0  | -298.9  | -50.63  | -1.70   | -0.66   | -0.01   | 84.92   | 107.5   | -29.22  |
| $b_3$ (eV)               | 0.08   | 0.19   | 0.04   | 19.09  | -220.7  | -286.8  | 120.5   | -4.22   | 0.00    | 1.01    | -37.24  | -86.37  | 12.47   |
| $b_4$ (eV)               | -0.40  | -27.5  | -0.02  | -5.13  | -666.4  | -926.7  | 108.5   | -1.95   | -0.05   | -0.29   | -32.98  | -37.84  | 10.65   |
| $b_5$ (eV)               | -41.7  | -26.6  | -7.96  | -5.14  | -204.6  | -765.5  | -41.88  | -1.09   | 1.03    | 0.79    | -105.6  | 33.55   | -26.89  |
| $c_1$ (Å <sup>-1</sup> ) | 0.02   | 2.20   | 0.69   | 0.80   | 1.42    | 1.44    | -1.00   | 1.06    | 0.24    | 0.81    | 0.92    | 0.91    | 0.96    |
| $c_2$ (Å <sup>-1</sup> ) | 0.99   | 0.96   | 1.13   | 0.76   | 1.33    | 1.34    | 0.88    | 1.30    | 0.94    | 1.61    | 1.04    | 0.97    | 0.87    |
| $c_3$ (Å <sup>-1</sup> ) | 1.94   | 1.32   | 1.57   | 0.72   | 1.30    | 1.46    | 0.93    | 1.21    | 2.20    | 0.92    | 0.87    | 1.03    | 0.82    |
| $c_4$ (Å <sup>-1</sup> ) | 0.61   | 0.70   | 2.29   | 1.84   | 1.37    | 1.40    | 1.06    | 0.95    | 1.39    | 1.11    | 1.08    | 0.87    | 1.07    |
| $c_5$ (Å <sup>-1</sup> ) | 0.98   | 0.70   | 0.67   | 1.84   | 1.44    | 1.36    | 1.09    | 0.93    | 0.77    | 0.62    | 0.98    | 1.06    | 1.03    |
| $d_1$                    | -6.19  | 10.93  | 3.39   | -4.29  | -3.29   | -3.15   | 0.13    | 2.34    | 1.31    | 1.68    | 5.13    | 1.81    | 5.45    |
| $d_2$                    | 2.82   | 2.12   | 6.28   | -4.75  | 2.04    | 5.16    | 1.98    | -2.36   | 0.00    | -0.99   | -2.89   | -0.63   | 4.52    |
| $d_3$                    | 10.79  | 4.65   | 5.63   | -2.09  | 4.88    | -6.04   | 2.49    | 0.23    | 8.36    | 3.04    | 1.51    | 0.03    | 3.93    |
| $d_4$                    | -9.45  | -1.06  | 8.36   | 3.11   | -0.61   | -0.43   | -2.31   | -1.46   | -0.13   | -1.35   | -2.50   | 1.36    | 0.47    |
| $d_5$                    | -3.51  | 2.00   | 0.00   | -0.04  | -6.15   | 2.29    | -1.91   | -1.96   | -1.13   | -0.59   | 2.72    | 0.40    | 0.00    |
| $\alpha$ (Å)             | -0.01  | 0.00   | 0.31   | 0.67   | -0.84   | -8.35   | 0.36    | 0.26    | 0.18    | 0.11    | 0.05    | 0.01    | -0.01   |
| $\beta$ (eV)             | -11.5  | 1.20   | -1.95  | 0.00   | 2.32    | -1.69   | -1.50   | -0.96   | -1.57   | -2.14   | 0.41    | 0.32    | -11.34  |

$$E = \sum_{i=0}^{12} e_i(\Delta r)^i \#(S2)$$

**Table S3** Values of the fitting parameters using eqn (S2) for the energy curves of the epoxy molecule for Cu(111) surface. Eqn (S2) is the same as eqn (7) in the main text.

| $\theta$ (°)       | 0.0000 | 2.8125 | 5.6250 | 8.4375 | 11.2500 | 14.0625 | 16.8750 | 19.6875 | 22.5000 | 25.3125 | 28.1250 | 30.9375 | 33.7500 |
|--------------------|--------|--------|--------|--------|---------|---------|---------|---------|---------|---------|---------|---------|---------|
| $e_0$<br>(eV/Å)    | 0.00   | 0.00   | 0.00   | 0.00   | 0.00    | 0.00    | 0.00    | 0.00    | 0.00    | 0.00    | 0.00    | 0.00    | 0.00    |
| $e_1$<br>(eV/Å)    | 0.00   | 0.07   | 0.14   | 0.21   | 0.28    | 0.35    | 0.42    | 0.49    | 0.56    | 0.63    | 0.69    | 0.75    | 0.81    |
| $e_2$<br>(eV/Å)    | -0.01  | -0.01  | 0.00   | 0.00   | 0.01    | -0.01   | -0.02   | -0.02   | -0.03   | -0.04   | -0.05   | -0.06   | -0.07   |
| $e_3$<br>(eV/Å)    | 0.02   | 0.01   | 0.01   | 0.00   | 0.00    | 0.00    | -0.01   | -0.01   | -0.01   | 0.01    | -0.01   | -0.01   | -0.01   |
| $e_4$<br>(eV/Å)    | -0.02  | -0.01  | -0.01  | 0.00   | 0.00    | 0.00    | 0.00    | 0.00    | 0.00    | 0.00    | 0.00    | 0.00    | 0.00    |
| $e_5$<br>(eV/Å)    | 0.01   | 0.01   | 0.00   | 0.00   | 0.00    | 0.00    | 0.00    | 0.00    | 0.00    | 0.00    | 0.00    | 0.00    | 0.00    |
| $e_6$<br>(eV/Å)    | 0.00   | 0.00   | 0.00   | 0.00   | 0.00    | 0.00    | 0.00    | 0.00    | 0.00    | 0.00    | 0.00    | 0.00    | 0.00    |
| $e_7$<br>(eV/Å)    | 0.00   | 0.00   | 0.00   | 0.00   | 0.00    | 0.00    | 0.00    | 0.00    | 0.00    | 0.00    | 0.00    | 0.00    | 0.00    |
| $e_8$<br>(eV/Å)    | 0.00   | 0.00   | 0.00   | 0.00   | 0.00    | 0.00    | 0.00    | 0.00    | 0.00    | 0.00    | 0.00    | 0.00    | 0.00    |
| $e_9$<br>(eV/Å)    | 0.00   | 0.00   | 0.00   | 0.00   | 0.00    | 0.00    | 0.00    | 0.00    | 0.00    | 0.00    | 0.00    | 0.00    | 0.00    |
| $e_{10}$<br>(eV/Å) | 0.00   | 0.00   | 0.00   | 0.00   | 0.00    | 0.00    | 0.00    | 0.00    | 0.00    | 0.00    | 0.00    | 0.00    | 0.00    |
| $e_{11}$<br>(eV/Å) | 0.00   | 0.00   | 0.00   | 0.00   | 0.00    | 0.00    | 0.00    | 0.00    | 0.00    | 0.00    | 0.00    | 0.00    | 0.00    |
| $e_{12}$<br>(eV/Å) | 0.00   | 0.00   | 0.00   | 0.00   | 0.00    | 0.00    | 0.00    | 0.00    | 0.00    | 0.00    | 0.00    | 0.00    | 0.00    |

**Table S4** Values of the fitting parameters using eqn (S2) for the energy curves of the epoxy molecule for Cu<sub>2</sub>O(111) surface. Eqn (S2) is the same as eqn (7) in the main text.

| $\theta$ (°)       | 0.0000 | 2.8125 | 5.6250 | 8.4375 | 11.2500 | 14.0625 | 16.8750 | 19.6875 | 22.5000 | 25.3125 | 28.1250 | 30.9375 | 33.7500 |
|--------------------|--------|--------|--------|--------|---------|---------|---------|---------|---------|---------|---------|---------|---------|
| $e_0$<br>(eV/Å)    | -0.02  | -0.01  | 0.00   | 0.00   | 0.00    | 0.00    | 0.01    | 0.01    | 0.01    | 0.01    | 0.01    | 0.01    | 0.01    |
| $e_1$<br>(eV/Å)    | 0.30   | 0.22   | 0.20   | 0.21   | 0.24    | 0.26    | 0.28    | 0.31    | 0.33    | 0.36    | 0.39    | 0.42    | 0.45    |
| $e_2$<br>(eV/Å)    | -0.81  | -0.49  | -0.31  | -0.24  | -0.20   | -0.15   | -0.11   | -0.06   | -0.02   | 0.01    | 0.05    | 0.08    | 0.11    |
| $e_3$<br>(eV/Å)    | 0.77   | 0.45   | 0.28   | 0.21   | 0.18    | 0.15    | 0.12    | 0.09    | 0.06    | 0.03    | 0.01    | -0.02   | -0.04   |
| $e_4$<br>(eV/Å)    | -0.38  | -0.21  | -0.13  | -0.10  | -0.08   | -0.07   | -0.06   | -0.05   | -0.04   | -0.03   | -0.02   | -0.01   | 0.00    |
| $e_5$<br>(eV/Å)    | 0.11   | 0.06   | 0.04   | 0.03   | 0.02    | 0.02    | 0.02    | 0.01    | 0.01    | 0.01    | 0.01    | 0.01    | 0.00    |
| $e_6$<br>(eV/Å)    | -0.02  | -0.01  | -0.01  | 0.00   | 0.00    | 0.00    | 0.00    | 0.00    | 0.00    | 0.00    | 0.00    | 0.00    | 0.00    |
| $e_7$<br>(eV/Å)    | 0.00   | 0.00   | 0.00   | 0.00   | 0.00    | 0.00    | 0.00    | 0.00    | 0.00    | 0.00    | 0.00    | 0.00    | 0.00    |
| $e_8$<br>(eV/Å)    | 0.00   | 0.00   | 0.00   | 0.00   | 0.00    | 0.00    | 0.00    | 0.00    | 0.00    | 0.00    | 0.00    | 0.00    | 0.00    |
| $e_9$<br>(eV/Å)    | 0.00   | 0.00   | 0.00   | 0.00   | 0.00    | 0.00    | 0.00    | 0.00    | 0.00    | 0.00    | 0.00    | 0.00    | 0.00    |
| $e_{10}$<br>(eV/Å) | 0.00   | 0.00   | 0.00   | 0.00   | 0.00    | 0.00    | 0.00    | 0.00    | 0.00    | 0.00    | 0.00    | 0.00    | 0.00    |
| $e_{11}$<br>(eV/Å) | 0.00   | 0.00   | 0.00   | 0.00   | 0.00    | 0.00    | 0.00    | 0.00    | 0.00    | 0.00    | 0.00    | 0.00    | 0.00    |
| $e_{12}$<br>(eV/Å) | 0.00   | 0.00   | 0.00   | 0.00   | 0.00    | 0.00    | 0.00    | 0.00    | 0.00    | 0.00    | 0.00    | 0.00    | 0.00    |

$$E = \sum_{i=1}^5 b_i \cos(c_i \Delta r - d_i) + \beta \#(S3)$$

**Table S5** Values of the fitting parameters using eqn (S3) for the energy curves of the epoxy molecule for Cu(111) surface. Eqn (S3) is the same as eqn (8) in the main text.

| $\theta$ (°)             | 0.0000 | 2.8125 | 5.6250 | 8.4375 | 11.2500 | 14.0625 | 16.8750 | 19.6875 | 22.5000 | 25.3125 | 28.1250 | 30.9375 | 33.7500 |
|--------------------------|--------|--------|--------|--------|---------|---------|---------|---------|---------|---------|---------|---------|---------|
| $b_1$ (eV)               | -0.05  | 0.07   | -0.04  | -0.35  | -2.08   | -1382   | -1956   | -1508   | 213.58  | 241.09  | 43.66   | 68.26   | -118.2  |
| $b_2$ (eV)               | -1.08  | -0.01  | -0.01  | -4.14  | -0.04   | -328.5  | -2208   | -1617   | 616.47  | 1308.1  | 182.24  | 405.07  | 353.65  |
| $b_3$ (eV)               | -0.16  | 0.90   | -1.00  | -8.28  | 104.61  | 1632.8  | 2377.7  | -323.0  | -1130   | -1188   | -122.9  | -311.4  | -700.0  |
| $b_4$ (eV)               | 0.86   | -5.66  | 4.30   | -4.14  | 2.12    | 949.72  | 482.27  | 1328.9  | 910.82  | -693.7  | -236.9  | -204.3  | 533.68  |
| $b_5$ (eV)               | 1.39   | -0.89  | 0.99   | 5.01   | 37.48   | 1541.4  | 1354.4  | 912.72  | 1044.8  | -1028   | -214.4  | -364.5  | 623.23  |
| $c_1$ (Å <sup>-1</sup> ) | 2.49   | 0.27   | 0.46   | 0.32   | 2.46    | 0.58    | 0.54    | 0.39    | 0.72    | 0.69    | 0.81    | 0.76    | 0.71    |
| $c_2$ (Å <sup>-1</sup> ) | 0.35   | 2.06   | 2.66   | 2.49   | 2.24    | 0.76    | 0.39    | 0.20    | 0.66    | 0.19    | 0.61    | 0.21    | 0.65    |
| $c_3$ (Å <sup>-1</sup> ) | 0.91   | 2.47   | 2.10   | 2.48   | 0.07    | 0.21    | 0.20    | 0.71    | 0.20    | 0.37    | 0.74    | 0.57    | 0.20    |
| $c_4$ (Å <sup>-1</sup> ) | 0.72   | 0.01   | 0.05   | 2.46   | 2.45    | 0.69    | 0.70    | 0.54    | 0.55    | 0.63    | 0.22    | 0.69    | 0.54    |
| $c_5$ (Å <sup>-1</sup> ) | 0.57   | 2.48   | 2.09   | 0.09   | 0.12    | 0.41    | 0.65    | 0.65    | 0.39    | 0.52    | 0.44    | 0.41    | 0.39    |
| $d_1$                    | 5.78   | -1.91  | 1.02   | -0.85  | 2.86    | -3.35   | -3.53   | -1.15   | 0.55    | -5.87   | -5.22   | -5.42   | -8.71   |
| $d_2$                    | 1.77   | 6.41   | 5.60   | 2.63   | 1.40    | -2.43   | -7.45   | -5.27   | -2.90   | -2.16   | 0.06    | -2.03   | -9.04   |
| $d_3$                    | 1.52   | 3.87   | 4.36   | 5.67   | -2.66   | -2.07   | 4.14    | 3.63    | 7.31    | -1.19   | -5.57   | -3.23   | -5.21   |
| $d_4$                    | 0.54   | -5.58  | -2.71  | 8.72   | 2.83    | -2.76   | -5.82   | -6.66   | -12.90  | -6.16   | -5.12   | -5.76   | -6.48   |
| $d_5$                    | 2.88   | 3.92   | 10.62  | -2.53  | -5.48   | -4.18   | -2.98   | 3.33    | -4.27   | -3.57   | -0.85   | -0.94   | -4.17   |
| $\beta$ (eV)             | 0.44   | 4.38   | 3.95   | 4.36   | 66.86   | 852.29  | 1253.4  | 848.84  | 593.41  | 695.01  | 125.28  | 215.73  | 374.81  |

**Table S6** Values of the fitting parameters using eqn (S3) for the energy curves of the epoxy molecule for Cu<sub>2</sub>O(111) surface. Eqn (S3) is the same as eqn (8) in the main text.

| $\theta$ (°)             | 0.0000 | 2.8125 | 5.6250 | 8.4375 | 11.2500 | 14.0625 | 16.8750 | 19.6875 | 22.5000 | 25.3125 | 28.1250 | 30.9375 | 33.7500 |
|--------------------------|--------|--------|--------|--------|---------|---------|---------|---------|---------|---------|---------|---------|---------|
| $b_1$ (eV)               | 4.36   | 0.06   | -0.36  | 0.96   | 2124.4  | 1753.8  | -1694   | 985.38  | 354.62  | 165.01  | 4906.0  | 4318.8  | 1595.8  |
| $b_2$ (eV)               | 32.10  | 260.8  | 9387   | 0.54   | 0.15    | 682.74  | -1621   | -366.7  | 139.71  | 66.04   | 1887.4  | -4274   | -5125   |
| $b_3$ (eV)               | 1.69   | 506.8  | 40183  | 134.5  | 5073.4  | -2108   | -4393   | -386.1  | -423.7  | -159.5  | -6019   | 1659.1  | 4167.6  |
| $b_4$ (eV)               | -20.0  | 95.15  | -25789 | 139.8  | 5004.6  | -636.9  | -4274   | -954.9  | -133.6  | -63.23  | -1863   | -5291   | -4150   |
| $b_5$ (eV)               | -16.9  | 246.6  | 35095  | -274   | 2055.5  | -1674   | -5351   | -1188   | -342.3  | -195.4  | -4863   | -1643   | 1598.0  |
| $c_1$ (Å <sup>-1</sup> ) | 0.37   | 1.55   | 1.15   | 0.97   | 1.38    | 0.93    | 0.93    | 0.91    | 0.91    | 0.91    | 0.87    | 0.86    | 0.87    |
| $c_2$ (Å <sup>-1</sup> ) | 0.68   | 0.92   | 0.28   | 0.79   | 0.75    | 0.95    | 0.83    | 0.80    | 0.94    | 0.95    | 0.89    | 0.80    | 0.83    |
| $c_3$ (Å <sup>-1</sup> ) | 1.11   | 0.91   | 0.10   | 1.42   | 1.39    | 0.89    | 0.91    | 0.94    | 0.86    | 0.78    | 0.84    | 0.88    | 0.85    |
| $c_4$ (Å <sup>-1</sup> ) | 0.75   | 0.00   | 0.25   | 1.40   | 1.40    | 0.83    | 0.85    | 0.83    | 0.77    | 0.74    | 0.80    | 0.83    | 0.80    |
| $c_5$ (Å <sup>-1</sup> ) | 0.56   | 0.91   | 0.18   | 1.41   | 1.41    | 0.86    | 0.88    | 0.87    | 0.80    | 0.85    | 0.81    | 0.79    | 0.78    |
| $d_1$                    | 0.00   | 7.16   | 6.34   | 3.05   | 7.19    | 0.29    | -6.07   | 0.02    | 0.00    | 0.00    | -0.47   | -0.56   | -3.60   |
| $d_2$                    | 2.78   | 0.64   | -3.61  | 3.97   | 3.26    | -2.63   | 5.56    | 5.17    | -2.82   | -2.76   | -3.45   | 1.99    | -0.92   |
| $d_3$                    | -2.35  | 3.66   | -2.23  | -1.29  | 4.15    | -0.06   | -3.10   | -6.02   | -0.54   | 1.79    | -0.76   | -3.53   | -0.63   |
| $d_4$                    | -2.90  | -0.18  | -3.93  | 4.80   | 1.15    | 5.63    | 2.60    | 2.30    | 4.81    | 4.48    | 5.05    | -0.85   | 1.92    |
| $d_5$                    | -4.58  | 6.69   | 1.76   | -1.39  | -1.89   | 2.72    | -0.25   | -0.40   | 2.03    | -0.65   | 2.10    | 4.95    | 1.73    |
| $\beta$ (eV)             | 5.05   | -90.3  | 21492  | 2.36   | 2.40    | 2.41    | 2.42    | 2.43    | 2.43    | 2.43    | 2.43    | 2.43    | 2.43    |



**Table S7** The sensitivity of the energy to the number of layers to be fixed for Cu(111) surface. The surface model was fixed from the lowest layer. The model with two fixed layers is used in the main text, and the relative energy for the other models is shown.

| Number of fixed layers | Energy (eV) |
|------------------------|-------------|
| 0                      | -0.02       |
| 1                      | -0.03       |
| 2                      | 0.00        |
| 3                      | 0.01        |

The following structural data for the epoxy resin on Cu(111) surface is provided in the VASP POSCAR format.

Epoxy resin on Cu(111) surface

```
1.0000000000000000
15.1403999328999994 0.0000000000000000 0.0000000000000000
0.0000000000000000 8.7412996292000003 0.0000000000000000
0.0000000000000000 0.0000000000000000 35.0000000000000000
```

Cu C H O

72 15 16 3

Selective dynamics

Direct

```
0.0000000000000000 0.1666699949999995 0.0588700745812574 F F F
0.1666699949999995 0.1666699949999995 0.0588700745812574 F F F
0.3333300050000005 0.1666699949999995 0.0588700745812574 F F F
0.5000000000000000 0.1666699949999995 0.0588700745812574 F F F
0.6666700239999983 0.1666699949999995 0.0588700745812574 F F F
0.8333299760000017 0.1666699949999995 0.0588700745812574 F F F
0.0833299980000035 0.4166699949999995 0.0588700745812574 F F F
0.2500000000000000 0.4166699949999995 0.0588700745812574 F F F
0.4166699949999995 0.4166699949999995 0.0588700745812574 F F F
0.5833299760000017 0.4166699949999995 0.0588700745812574 F F F
0.7500000000000000 0.4166699949999995 0.0588700745812574 F F F
0.9166700239999983 0.4166699949999995 0.0588700745812574 F F F
0.0000000000000000 0.6666700239999983 0.0588700745812574 F F F
0.1666699949999995 0.6666700239999983 0.0588700745812574 F F F
0.3333300050000005 0.6666700239999983 0.0588700745812574 F F F
0.5000000000000000 0.6666700239999983 0.0588700745812574 F F F
0.6666700239999983 0.6666700239999983 0.0588700745812574 F F F
0.8333299760000017 0.6666700239999983 0.0588700745812574 F F F
0.0833299980000035 0.9166700239999983 0.0588700745812574 F F F
0.2500000000000000 0.9166700239999983 0.0588700745812574 F F F
```

0.4166699949999995 0.9166700239999983 0.0588700745812574 F F F  
0.5833299760000017 0.9166700239999983 0.0588700745812574 F F F  
0.7500000000000000 0.9166700239999983 0.0588700745812574 F F F  
0.9166700239999983 0.9166700239999983 0.0588700745812574 F F F  
0.0833299980000035 0.0833299980000035 0.1177326688479852 F F F  
0.2500000000000000 0.0833299980000035 0.1177326688479852 F F F  
0.4166699949999995 0.0833299980000035 0.1177326688479852 F F F  
0.5833299760000017 0.0833299980000035 0.1177326688479852 F F F  
0.7500000000000000 0.0833299980000035 0.1177326688479852 F F F  
0.9166700239999983 0.0833299980000035 0.1177326688479852 F F F  
0.0000000000000000 0.3333300050000005 0.1177326688479852 F F F  
0.1666699949999995 0.3333300050000005 0.1177326688479852 F F F  
0.3333300050000005 0.3333300050000005 0.1177326688479852 F F F  
0.5000000000000000 0.3333300050000005 0.1177326688479852 F F F  
0.6666700239999983 0.3333300050000005 0.1177326688479852 F F F  
0.8333299760000017 0.3333300050000005 0.1177326688479852 F F F  
0.0833299980000035 0.5833299760000017 0.1177326688479852 F F F  
0.2500000000000000 0.5833299760000017 0.1177326688479852 F F F  
0.4166699949999995 0.5833299760000017 0.1177326688479852 F F F  
0.5833299760000017 0.5833299760000017 0.1177326688479852 F F F  
0.7500000000000000 0.5833299760000017 0.1177326688479852 F F F  
0.9166700239999983 0.5833299760000017 0.1177326688479852 F F F  
0.0000000000000000 0.8333299760000017 0.1177326688479852 F F F  
0.1666699949999995 0.8333299760000017 0.1177326688479852 F F F  
0.3333300050000005 0.8333299760000017 0.1177326688479852 F F F  
0.5000000000000000 0.8333299760000017 0.1177326688479852 F F F  
0.6666700239999983 0.8333299760000017 0.1177326688479852 F F F  
0.8333299760000017 0.8333299760000017 0.1177326688479852 F F F  
0.9998543171080175 0.9992604582479259 0.1775395453563490 T T T  
0.1664263366559771 0.9989508708638889 0.1773103166775926 T T T  
0.3325290241092181 0.9989640996638554 0.1771219419518852 T T T  
0.4992316065819011 0.0005092538953073 0.1775953375230706 T T T  
0.6669691617579124 -0.0008232997038633 0.1771563292744323 T T T

0.8333534876868874 -0.0008309176047076 0.1772180398806905 T T T  
0.0831155739572244 0.2488448798352378 0.1772430036964522 T T T  
0.2499127882311596 0.2484430646989559 0.1769782893541069 T T T  
0.4164166275717809 0.2500991881349108 0.1770209089491300 T T T  
0.5833618243922796 0.2497811805944748 0.1766479173043274 T T T  
0.7498356979170959 0.2487976585125453 0.1771727681033635 T T T  
0.9168594640594117 0.2488322424810865 0.1769270809675466 T T T  
0.0001754637714975 0.4994340986884067 0.1769015207787104 T T T  
0.1664867452458573 0.4999382888861762 0.1770573978811819 T T T  
0.3331788942596611 0.4995025925980841 0.1770388872712393 T T T  
0.4997596172125189 0.4995815298769944 0.1770722517991988 T T T  
0.6660613144132219 0.4997725136976437 0.1771593844899304 T T T  
0.8336394218221679 0.5001985795334094 0.1771720346613351 T T T  
0.0831253841739748 0.7499207209653598 0.1770953811800561 T T T  
0.2498786992172447 0.7500367936504363 0.1770860022149526 T T T  
0.4162781623987087 0.7488963346460910 0.1770850135422608 T T T  
0.5833944795583212 0.7497072601435960 0.1770971273523441 T T T  
0.7497782069023567 0.7503213262401667 0.1769822149419246 T T T  
0.9167879076727973 0.7501426371193861 0.1770588271362496 T T T  
0.1824080297683199 0.5513110768128999 0.2654121920082016 T T T  
0.2680044712888214 0.4925665783743062 0.2657752684382202 T T T  
0.2813912805774146 0.3342590001814405 0.2694353085999743 T T T  
0.2088610101817483 0.2350528777515710 0.2719913575077169 T T T  
0.1233557790389994 0.2959898941500458 0.2714898822631875 T T T  
0.1095317616803339 0.4534482494492213 0.2684902131207135 T T T  
0.3880305016100454 0.1398303066661274 0.2850441862565790 T T T  
0.4878586198272625 0.1121261659851374 0.2832495420953239 T T T  
0.5404637264269662 0.2597276287257605 0.2792887684693423 T T T  
0.6930036738600701 0.3275750813709961 0.2716326439991854 T T T  
0.7807181652472299 0.2779507779495922 0.2676634760680805 T T T  
0.6727831140636543 0.4841372745580680 0.2693577578710569 T T T  
0.8479203625944426 0.3852488203423201 0.2628638584076231 T T T  
0.7411498542078712 0.5900261105244685 0.2644123144831826 T T T

0.8288901295195198 0.5419377235937083 0.2614433263056522 T T T  
0.1725305875835083 0.6744193421122068 0.2626446982121814 T T T  
0.3253902323823414 0.5672867150593169 0.2633823302057197 T T T  
0.2179944880265468 0.1118027056036563 0.2740349073315501 T T T  
0.0671645252638825 0.2181364035539484 0.2732280792269954 T T T  
0.0428421242860449 0.5002835672076067 0.2684035489147875 T T T  
0.3641119871410747 0.1360311253101346 0.3148061638778554 T T T  
0.3558170985525309 0.0479583122656519 0.2685809605722779 T T T  
0.5081806115452137 0.0551016550840120 0.3100414391352912 T T T  
0.5283030146791834 0.3364528460350997 0.3037940575698351 T T T  
0.5222476915808099 0.3192367679251703 0.2526176684926159 T T T  
0.7949444691090425 0.1557917494036782 0.2686223381292372 T T T  
0.6049396772583684 0.5245152288054898 0.2712775066226919 T T T  
0.9158680045986118 0.3455694387243237 0.2598130629062722 T T T  
0.7251588828464228 0.7115456132662810 0.2626278839192185 T T T  
0.8816427443836613 0.6255730171359138 0.2578819848745170 T T T  
0.5694449457553022 0.0085806020547740 0.2476078345188099 T T T  
0.3678680404463888 0.2873631875996208 0.2692389643746615 T T T  
0.6316965317946914 0.2150966140878585 0.2778682444712826 T T T  
0.5054966488813677 0.0093489639170883 0.2520591911020077 T T T

The following structural data for the epoxy resin on Cu<sub>2</sub>O(111) surface is provided in the VASP POSCAR format.

Epoxy resin on Cu<sub>2</sub>O(111) surface

```
1.0000000000000000
10.4411001204999998 0.0000000000000000 0.0000000000000000
0.0000000000000000 18.0846004485999998 0.0000000000000000
0.0000000000000000 0.0000000000000000 35.0000000000000000
```

C Cu H O

15 72 16 39

Selective dynamics

Direct

```
0.5442285857644862 0.3507198127222040 0.2627955288522514 T T T
0.5595413784291026 0.4242472885015118 0.2733020366310370 T T T
0.6835259538552165 0.4547235069458395 0.2754783129788265 T T T
0.7913128235329907 0.4099798141416144 0.2693959503202095 T T T
0.7756749541384949 0.3357268429949940 0.2596729250286458 T T T
0.6515903711391147 0.3049583981519675 0.2550486285093143 T T T
0.6001149430629340 0.5777893939428580 0.2827452706080322 T T T
0.6561244262775929 0.6551026153810326 0.2815787927731250 T T T
0.5552924274197650 0.7170862070104818 0.2811787649589732 T T T
0.3270116612035494 0.7309691003834615 0.2768456900588774 T T T
0.3369796096688518 0.8043212876606205 0.2649817213940864 T T T
0.2053129499632433 0.6976389421622287 0.2808231692934555 T T T
0.2255120213465034 0.8436419085080473 0.2544988703840971 T T T
0.0960342054816863 0.7367552781188493 0.2716249633056194 T T T
0.1035829363088965 0.8098317977655256 0.2570174521624864 T T T
0.0000000000000000 0.0000000000000000 0.0527318339515617 F F F
0.5000000000000000 0.0000000000000000 0.0527318339515617 F F F
0.2500000000000000 0.0833299980000035 0.0527318339515617 F F F
0.7500000000000000 0.0833299980000035 0.0527318339515617 F F F
0.0000000000000000 0.1666699949999995 0.0527318339515617 F F F
```

0.5000000000000000 0.1666699949999995 0.0527318339515617 F F F  
0.2500000000000000 0.2500000000000000 0.0527318339515617 F F F  
0.7500000000000000 0.2500000000000000 0.0527318339515617 F F F  
0.0000000000000000 0.3333300050000005 0.0527318339515617 F F F  
0.5000000000000000 0.3333300050000005 0.0527318339515617 F F F  
0.2500000000000000 0.4166699949999995 0.0527318339515617 F F F  
0.7500000000000000 0.4166699949999995 0.0527318339515617 F F F  
0.0000000000000000 0.5000000000000000 0.0527318339515617 F F F  
0.5000000000000000 0.5000000000000000 0.0527318339515617 F F F  
0.2500000000000000 0.5833299760000017 0.0527318339515617 F F F  
0.7500000000000000 0.5833299760000017 0.0527318339515617 F F F  
0.0000000000000000 0.6666700239999983 0.0527318339515617 F F F  
0.5000000000000000 0.6666700239999983 0.0527318339515617 F F F  
0.2500000000000000 0.7500000000000000 0.0527318339515617 F F F  
0.7500000000000000 0.7500000000000000 0.0527318339515617 F F F  
0.0000000000000000 0.8333299760000017 0.0527318339515617 F F F  
0.5000000000000000 0.8333299760000017 0.0527318339515617 F F F  
0.2500000000000000 0.9166700239999983 0.0527318339515617 F F F  
0.7500000000000000 0.9166700239999983 0.0527318339515617 F F F  
0.3333300050000005 0.0000000000000000 0.1230513741155193 F F F  
0.8333299760000017 0.0000000000000000 0.1230513741155193 F F F  
0.0833299980000035 0.0833299980000035 0.1230513741155193 F F F  
0.5833299760000017 0.0833299980000035 0.1230513741155193 F F F  
0.3333300050000005 0.1666699949999995 0.1230513741155193 F F F  
0.8333299760000017 0.1666699949999995 0.1230513741155193 F F F  
0.0833299980000035 0.2500000000000000 0.1230513741155193 F F F  
0.5833299760000017 0.2500000000000000 0.1230513741155193 F F F  
0.3333300050000005 0.3333300050000005 0.1230513741155193 F F F  
0.8333299760000017 0.3333300050000005 0.1230513741155193 F F F  
0.0833299980000035 0.4166699949999995 0.1230513741155193 F F F  
0.5833299760000017 0.4166699949999995 0.1230513741155193 F F F  
0.3333300050000005 0.5000000000000000 0.1230513741155193 F F F  
0.8333299760000017 0.5000000000000000 0.1230513741155193 F F F

0.0833299980000035 0.5833299760000017 0.1230513741155193 F F F  
0.5833299760000017 0.5833299760000017 0.1230513741155193 F F F  
0.3333300050000005 0.6666700239999983 0.1230513741155193 F F F  
0.8333299760000017 0.6666700239999983 0.1230513741155193 F F F  
0.0833299980000035 0.7500000000000000 0.1230513741155193 F F F  
0.5833299760000017 0.7500000000000000 0.1230513741155193 F F F  
0.3333300050000005 0.8333299760000017 0.1230513741155193 F F F  
0.8333299760000017 0.8333299760000017 0.1230513741155193 F F F  
0.0833299980000035 0.9166700239999983 0.1230513741155193 F F F  
0.5833299760000017 0.9166700239999983 0.1230513741155193 F F F  
0.1713009350462471 0.0049284494727999 0.1911330214648927 T T T  
0.7282761341285351 0.9822889594236202 0.1912854037335805 T T T  
0.4293614238863057 0.0801243254366355 0.1935768852657418 T T T  
0.9246534818626273 0.0734076060268762 0.1922306768194346 T T T  
0.2270268449546720 0.1497412708749550 0.1914392517861927 T T T  
0.6683110207792069 0.1583053276355884 0.1893480100231244 T T T  
0.4285718789205717 0.2342687623783419 0.1912692646956557 T T T  
0.9311060599748160 0.2468398368702580 0.1873325151511338 T T T  
0.1788851163383498 0.3197245736468233 0.1924214669772653 T T T  
0.6697959323389853 0.3205081636295262 0.1955774125760144 T T T  
0.4144169880345885 0.4172089848341543 0.1875377965028449 T T T  
0.9371917289787035 0.4028666414258169 0.1891786100186650 T T T  
0.1723312560202714 0.4542480982207024 0.1897310056944761 T T T  
0.6570050573949118 0.4941526587342082 0.1857994551039468 T T T  
0.4145844325875458 0.5839120692473756 0.1864835075310722 T T T  
0.9177361401763307 0.5718659977861122 0.1876750809904166 T T T  
0.1530778834851318 0.6642056173218620 0.1886213165821502 T T T  
0.6866151450444704 0.6626999135391642 0.1935135765206653 T T T  
0.4289500957588857 0.7554977120673527 0.1856933169712818 T T T  
0.9280918520838739 0.7383973521454905 0.1872745470016213 T T T  
0.1534709165248316 0.8145144751139597 0.1959254710184481 T T T  
0.6872846620123170 0.8376072386382560 0.1884702630521602 T T T  
0.4410128915581240 0.9128337945748513 0.1872113023847390 T T T



0.9389060508532268 0.9195700215941827 0.1919820916306207 T T T  
0.4482098272899009 0.3271231646857444 0.2612448171448207 T T T  
0.4754848439923194 0.4583302436437933 0.2783014732198623 T T T  
0.8867163527729147 0.4339382983341196 0.2717599392064471 T T T  
0.8606346906964717 0.3013744447468341 0.2562178973836282 T T T  
0.6380482883622278 0.2451365642801164 0.2530985819102298 T T T  
0.5411050365251953 0.5669644040929498 0.2572604357138246 T T T  
0.5411789599420516 0.5712774680281996 0.3086134020514137 T T T  
0.7222386606414517 0.6623677179418053 0.3057792607989924 T T T  
0.5627388747151443 0.7468686948629255 0.2537325163464814 T T T  
0.5730694310789985 0.7570260816871510 0.3043744816502709 T T T  
0.4291980479733724 0.8317058900678092 0.2624743304062349 T T T  
0.2001552513430624 0.6406718313246884 0.2908476114332927 T T T  
0.2327117779443313 0.9028450048016552 0.2486481686075166 T T T  
0.0029092555616046 0.7106958603975286 0.2748633495879176 T T T  
0.0168203838927781 0.8432299067028524 0.2544474322049410 T T T  
0.8168454810422290 0.6396033685505529 0.2487421555024341 T T T  
0.6666700239999983 0.0000000000000000 0.0351597704731645 F F F  
0.1666699949999995 0.1666699949999995 0.0351597704731645 F F F  
0.6666700239999983 0.3333300050000005 0.0351597704731645 F F F  
0.1666699949999995 0.5000000000000000 0.0351597704731645 F F F  
0.6666700239999983 0.6666700239999983 0.0351597704731645 F F F  
0.1666699949999995 0.8333299760000017 0.0351597704731645 F F F  
0.3333300050000005 0.0000000000000000 0.0703117172322081 F F F  
0.8333299760000017 0.1666699949999995 0.0703117172322081 F F F  
0.3333300050000005 0.3333300050000005 0.0703117172322081 F F F  
0.8333299760000017 0.5000000000000000 0.0703117172322081 F F F  
0.3333300050000005 0.6666700239999983 0.0703117172322081 F F F  
0.8333299760000017 0.8333299760000017 0.0703117172322081 F F F  
0.0000000000000000 0.0000000000000000 0.1054714908348586 F F F  
0.5000000000000000 0.1666699949999995 0.1054714908348586 F F F  
0.0000000000000000 0.3333300050000005 0.1054714908348586 F F F  
0.5000000000000000 0.5000000000000000 0.1054714908348586 F F F

0.0000000000000000 0.6666700239999983 0.1054714908348586 F F F  
0.5000000000000000 0.8333299760000017 0.1054714908348586 F F F  
0.6666700239999983 0.0000000000000000 0.1406312573961728 F F F  
0.1666699949999995 0.1666699949999995 0.1406312573961728 F F F  
0.6666700239999983 0.3333300050000005 0.1406312573961728 F F F  
0.1666699949999995 0.5000000000000000 0.1406312573961728 F F F  
0.6666700239999983 0.6666700239999983 0.1406312573961728 F F F  
0.1666699949999995 0.8333299760000017 0.1406312573961728 F F F  
0.3428013127683585 0.9964850160756811 0.1763975083471365 T T T  
0.8414504292502230 0.1598926174493940 0.1762626856062255 T T T  
0.3486092121756528 0.3226867448118966 0.1763198950384037 T T T  
0.8332038828541926 0.4844474676721404 0.1760226142980557 T T T  
0.3274601866935072 0.6716255839723360 0.1764864083303692 T T T  
0.8598081745063268 0.8319585659211981 0.1759558044700213 T T T  
0.0159283415402385 0.9989247090231004 0.2153801482855684 T T T  
0.5146567140151035 0.1578313821716293 0.2150326796460789 T T T  
0.0171072417981009 0.3222406943589462 0.2117481046983087 T T T  
0.4932554318283309 0.5015557726495672 0.2054034793646551 T T T  
0.9909052629491697 0.6528499780271417 0.2097741091079044 T T T  
0.5245403007576570 0.8319633888768152 0.2067026691085658 T T T  
0.7071684854067684 0.5274625575975804 0.2835176254888623 T T T  
0.4290500675259423 0.6864087463716828 0.2853717125924859 T T T  
0.7345256918202310 0.6660764293926320 0.2472757636814364 T T T
